# Supplementary material for: Relevance of VEGFA in rat livers subjected to partial hepatectomy under ischemia-reperfusion
Source: PubMed Central journal article supplement (PMC6713699; doi:10.1007/s00109-019-01811-y), 2019-06-29

## ESM\_3

**RELEVANCE OF VEGFA IN RAT LIVERS SUBJECTED TO PARTIAL HEPATECTOMY  
UNDER ISCHEMIA-REPERFUSION  
JOURNAL OF MOLECULAR MEDICINE**

Esther Bujaldon<sup>1\*</sup>, María Eugenia Cornide-Petronio<sup>1\*</sup>, José Gulfo<sup>2</sup>, Floriana Rotondo<sup>1</sup>, Cindy Ávalos de León<sup>1</sup>, Elsa Negrete-Sánchez<sup>1</sup>, Jordi Gracia-Sancho<sup>3</sup>, Anna Novials<sup>4,5</sup>, Mónica B. Jiménez-Castro<sup>6#</sup>, Carmen Peralta<sup>1, 2, 7#</sup>

<sup>1</sup>Institut d'Investigacions Biomèdiques August Pi i Sunyer (IDIBAPS), Barcelona, Spain; <sup>2</sup>Centro de Investigación Biomédica en Red de Enfermedades Hepáticas y Digestivas, Barcelona, Spain. <sup>3</sup>Liver Vascular Biology Research Group, IDIBAPS, CIBEREHD, Barcelona, Spain; <sup>4</sup>Diabetes and Obesity Research Laboratory, Institut d'Investigacions Biomèdiques August Pi i Sunyer (IDIBAPS), Barcelona, Spain; <sup>5</sup>Spanish Biomedical Research Center in Diabetes and Associated Metabolic Disorders (CIBERDEM), Barcelona, Spain; <sup>6</sup>Transplant Biomedicals S.L., Barcelona, Spain; <sup>7</sup>Facultad de Medicina, Universidad Internacional de Cataluña, Barcelona, Spain.

\* EB and MECP contributed equally to this work (as first author)

# MJC and CP contributed equally to this work (as last author)

Correspondence to: Carmen Peralta Uroz

E-mail: cperalta@clinic.ub.es

Telephone: +34932275400 Ext 4177

**SUPPLEMENTARY FIGURE LEGEND**

**Supplementary Figure 3.** Impact of VEGFA on hepatic damage and liver regeneration 24 h after surgery and survival rate in SD and CDD-SD rats. (A) Protein levels of hepatic VEGFA (Representative Western blots at the top and densitometric analysis at the bottom) and sFlt1 levels in plasma and adipose tissue. (B) Hepatic injury (plasma AST, ALT and GLDH levels and damage score). (C) Hepatic regeneration (percentage of Ki67-positive-hepatocytes and cyclins D1, E and A levels). \*P < 0.05 versus sham; +P < 0.05 versus PH+I/R.

## A VEGFA blot in liver

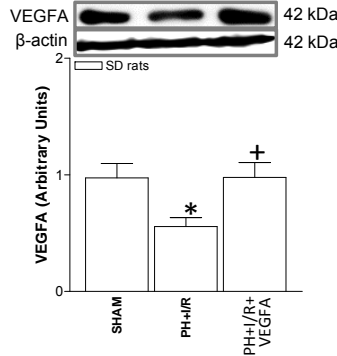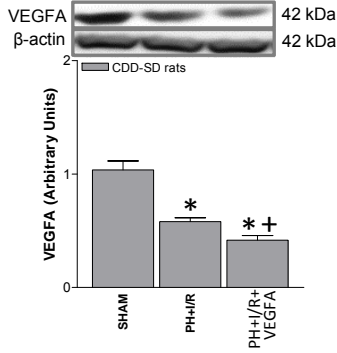

## Circulating sFlt1

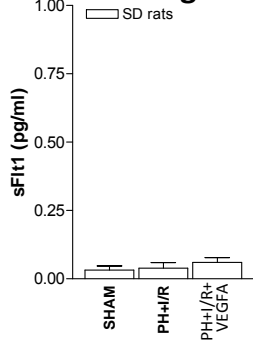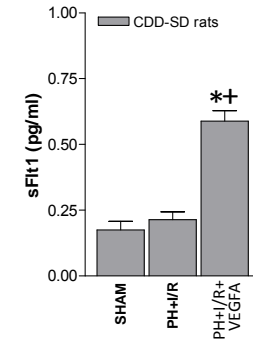

## sFlt1 mRNA in adipose tissue

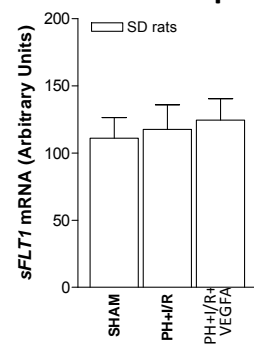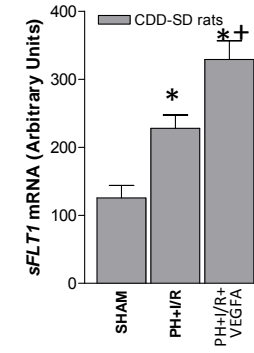

## B Hepatic injury

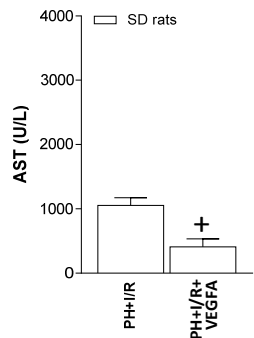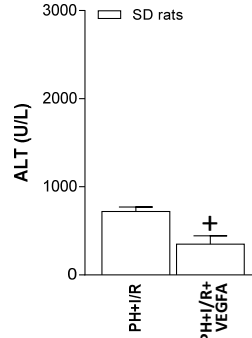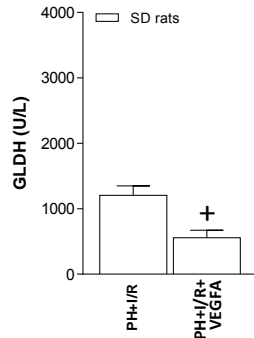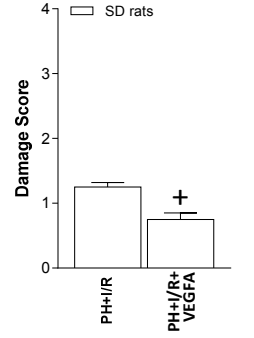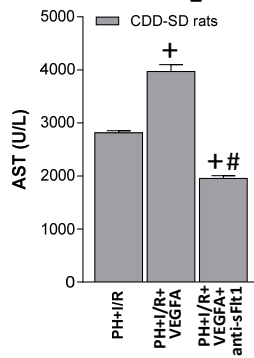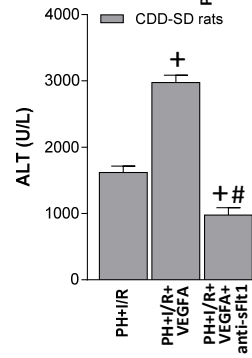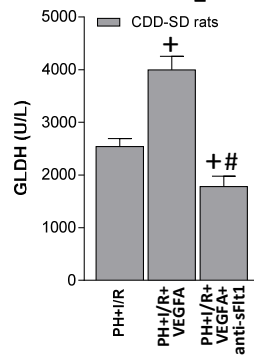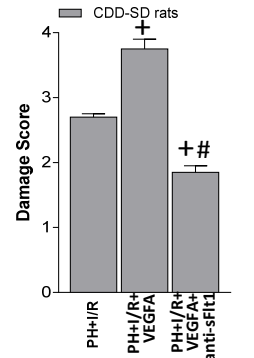

## C Liver regeneration

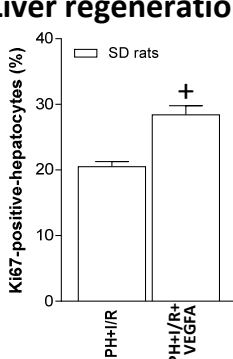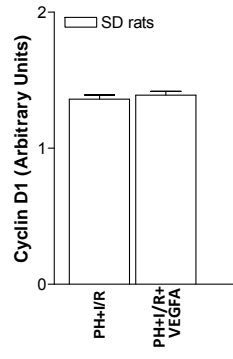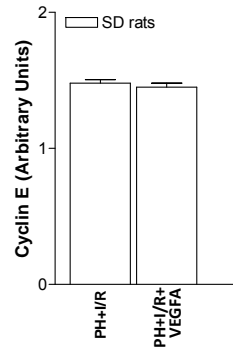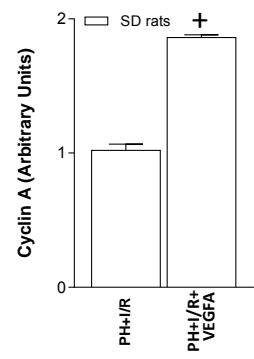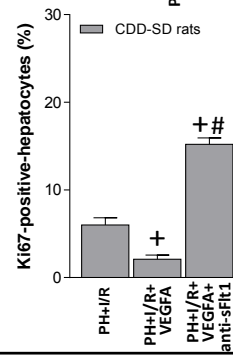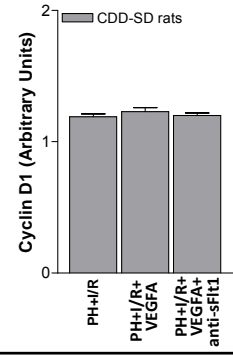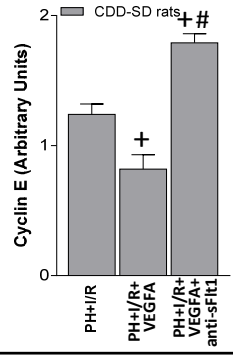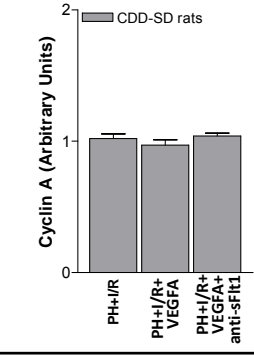

Supplement: 109_2019_1811_MOESM3_ESM.pdf [file 109_2019_1811_MOESM3_ESM.pdf]
