# Supplementary material for: Relevance of VEGFA in rat livers subjected to partial hepatectomy under ischemia-reperfusion
Source: PubMed Central journal article supplement (PMC6713699; doi:10.1007/s00109-019-01811-y), 2019-06-29

ESM\_2

**RELEVANCE OF VEGFA IN RAT LIVERS SUBJECTED TO PARTIAL HEPATECTOMY  
UNDER ISCHEMIA-REPERFUSION  
JOURNAL OF MOLECULAR MEDICINE**

Esther Bujaldon<sup>1\*</sup>, María Eugenia Cornide-Petronio<sup>1\*</sup>, José Gulfo<sup>2</sup>, Floriana Rotondo<sup>1</sup>, Cindy Ávalos de León<sup>1</sup>, Elsa Negrete-Sánchez<sup>1</sup>, Jordi Gracia-Sancho<sup>3</sup>, Anna Novials<sup>4,5</sup>, Mónica B. Jiménez-Castro<sup>6#</sup>, Carmen Peralta<sup>1, 2, 7#</sup>

<sup>1</sup>Institut d'Investigacions Biomèdiques August Pi i Sunyer (IDIBAPS), Barcelona, Spain; <sup>2</sup>Centro de Investigación Biomédica en Red de Enfermedades Hepáticas y Digestivas, Barcelona, Spain. <sup>3</sup>Liver Vascular Biology Research Group, IDIBAPS, CIBEREHD, Barcelona, Spain; <sup>4</sup>Diabetes and Obesity Research Laboratory, Institut d'Investigacions Biomèdiques August Pi i Sunyer (IDIBAPS), Barcelona, Spain; <sup>5</sup>Spanish Biomedical Research Center in Diabetes and Associated Metabolic Disorders (CIBERDEM), Barcelona, Spain; <sup>6</sup>Transplant Biomedicals S.L., Barcelona, Spain; <sup>7</sup>Facultad de Medicina, Universidad Internacional de Cataluña, Barcelona, Spain.

\* EB and MECP contributed equally to this work (as first author)

# MJC and CP contributed equally to this work (as last author)

Correspondence to: Carmen Peralta Uroz

E-mail: cperalta@clinic.ub.es

Telephone: +34932275400 Ext 4177

**SUPPLEMENTARY FIGURE LEGENDS**

**Supplementary Figure 2.** Effect of VEGFA on hepatic damage and regeneration in Ob Zucker rats undergoing PH+I/R 72 h after surgery. (A) Plasma AST, ALT, GLDH, damage score, ALP and bilirubin levels. (B) Hepatic regeneration (percentage of Ki67-positive-hepatocytes, representative photomicrographs of Ki-67 immunohistochemical positivity (10x) and cyclin E levels). +P < 0.05 versus PH+I/R.

# A Hepatic damage

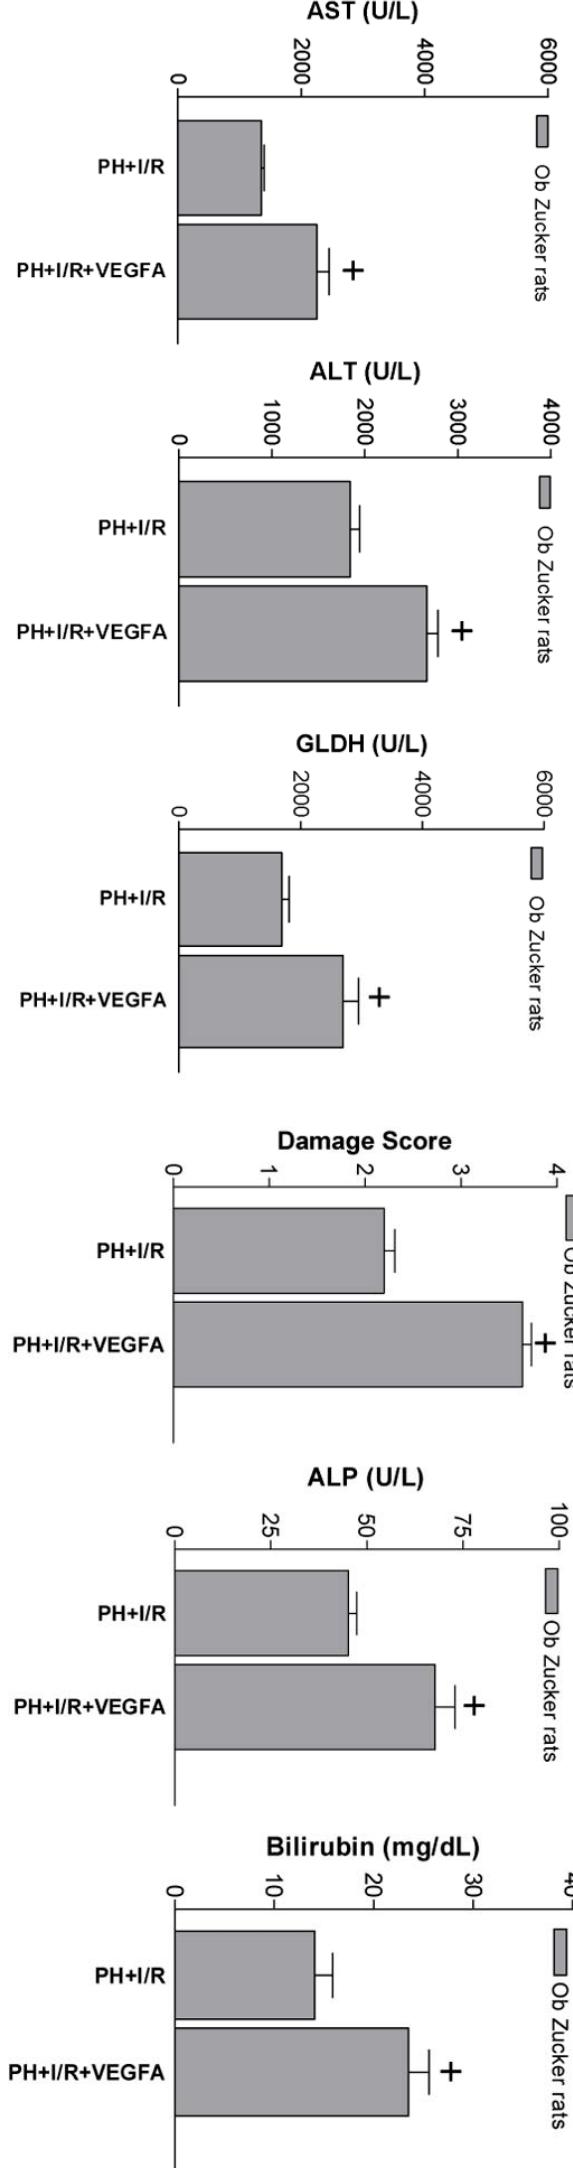

# B Liver regeneration

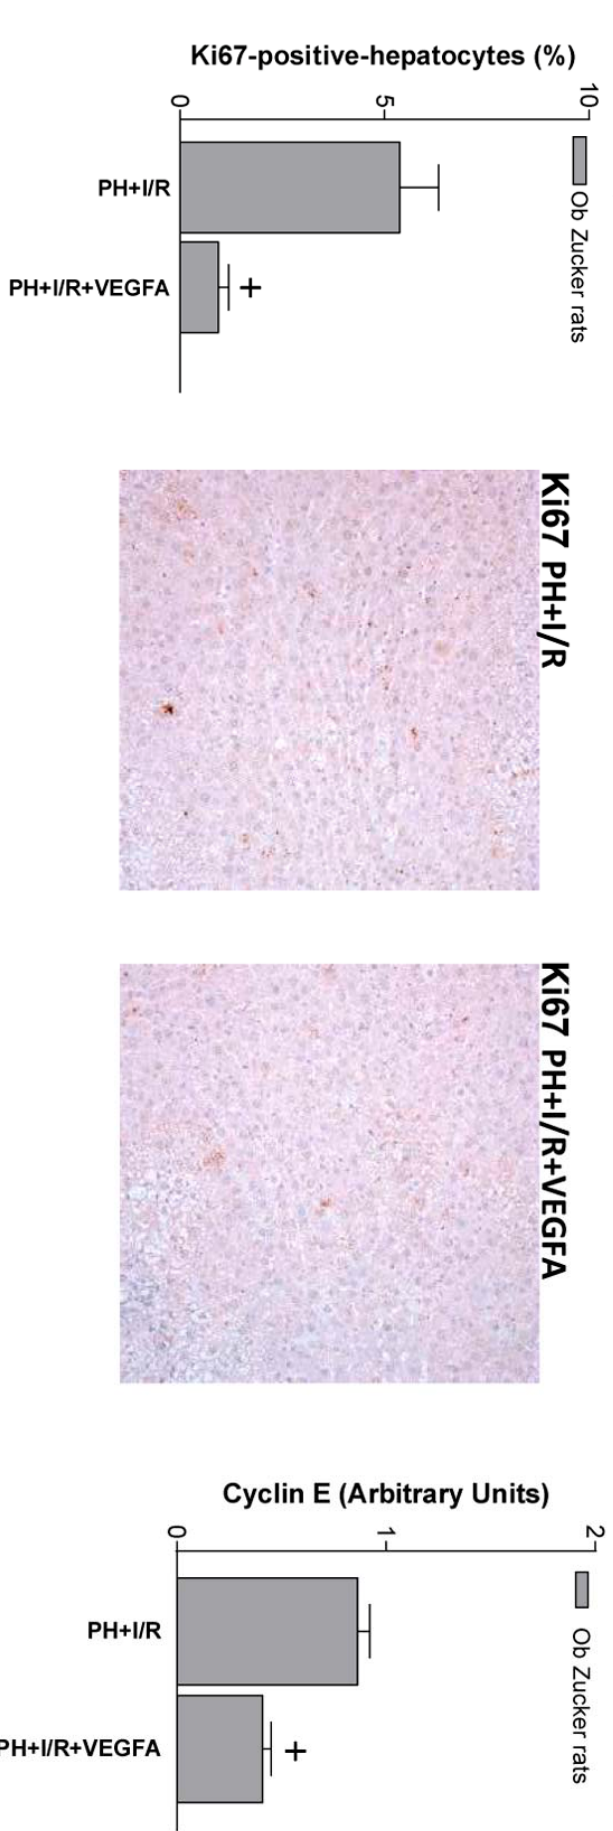

Supplement: 109_2019_1811_MOESM2_ESM.pdf [file 109_2019_1811_MOESM2_ESM.pdf]
